# Supplementary material for: ROS-Mediated Anti-Tumor Effect of Coptidis Rhizoma against Human Hepatocellular Carcinoma Hep3B Cells and Xenografts
Source: MDPI journal article supplement (doi:10.3390/ijms22094797), 2021-04-30
Supplement: s1 [file s1]

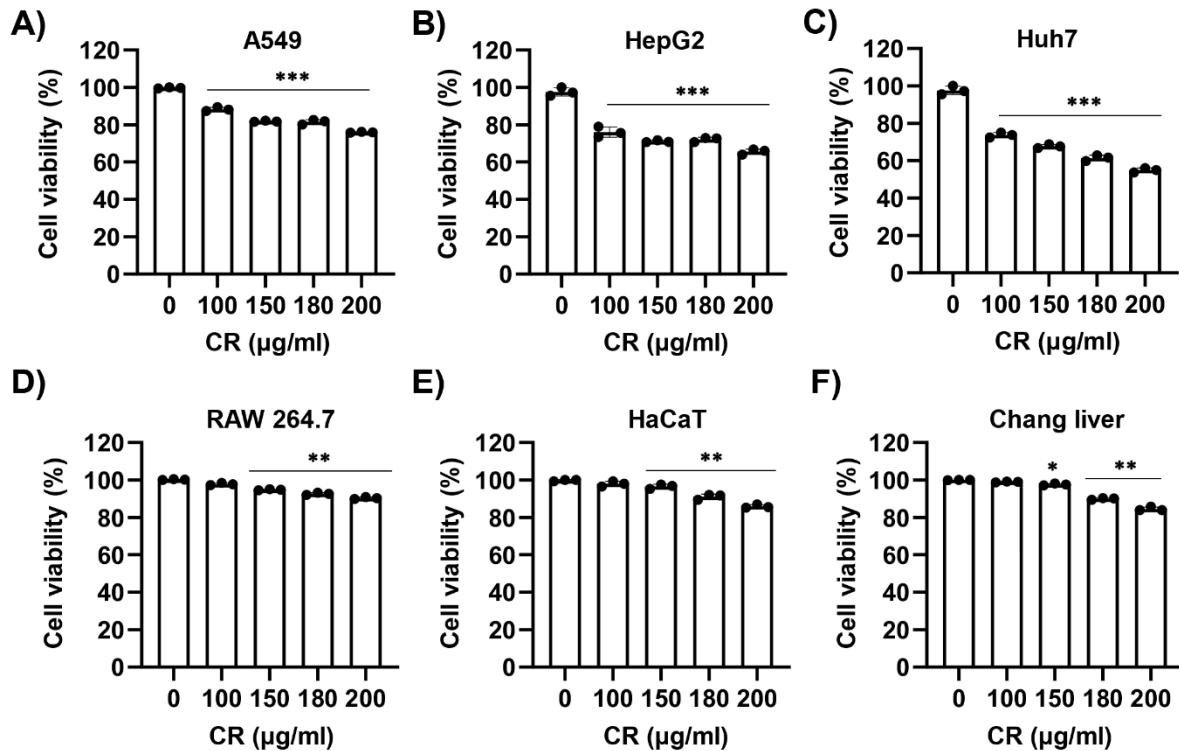

**Supplementary Figure S1.** Effect of Coptidis Rhizoma ethanol extract (CR) on cell viability in the various cell lines. Various concentrations of CR were treated on human lung cancer A549 cells (**A**), human hepatoma HepG2 cells (**B**), human hepatoma Huh7 cells (**C**), mouse macrophage RAW 264.7 cells (**D**), human keratinocyte HaCaT cells (**E**) and normal Chang liver cells (**F**). After 24 h, the cell viability was assessed by an MTT assay. Each bar represents the mean  $\pm$  SD of three independent experiments ( $n = 3$ ). \*  $p < 0.05$ , \*\*  $p < 0.01$  and \*\*\*  $p < 0.001$  compared to untreated cells.

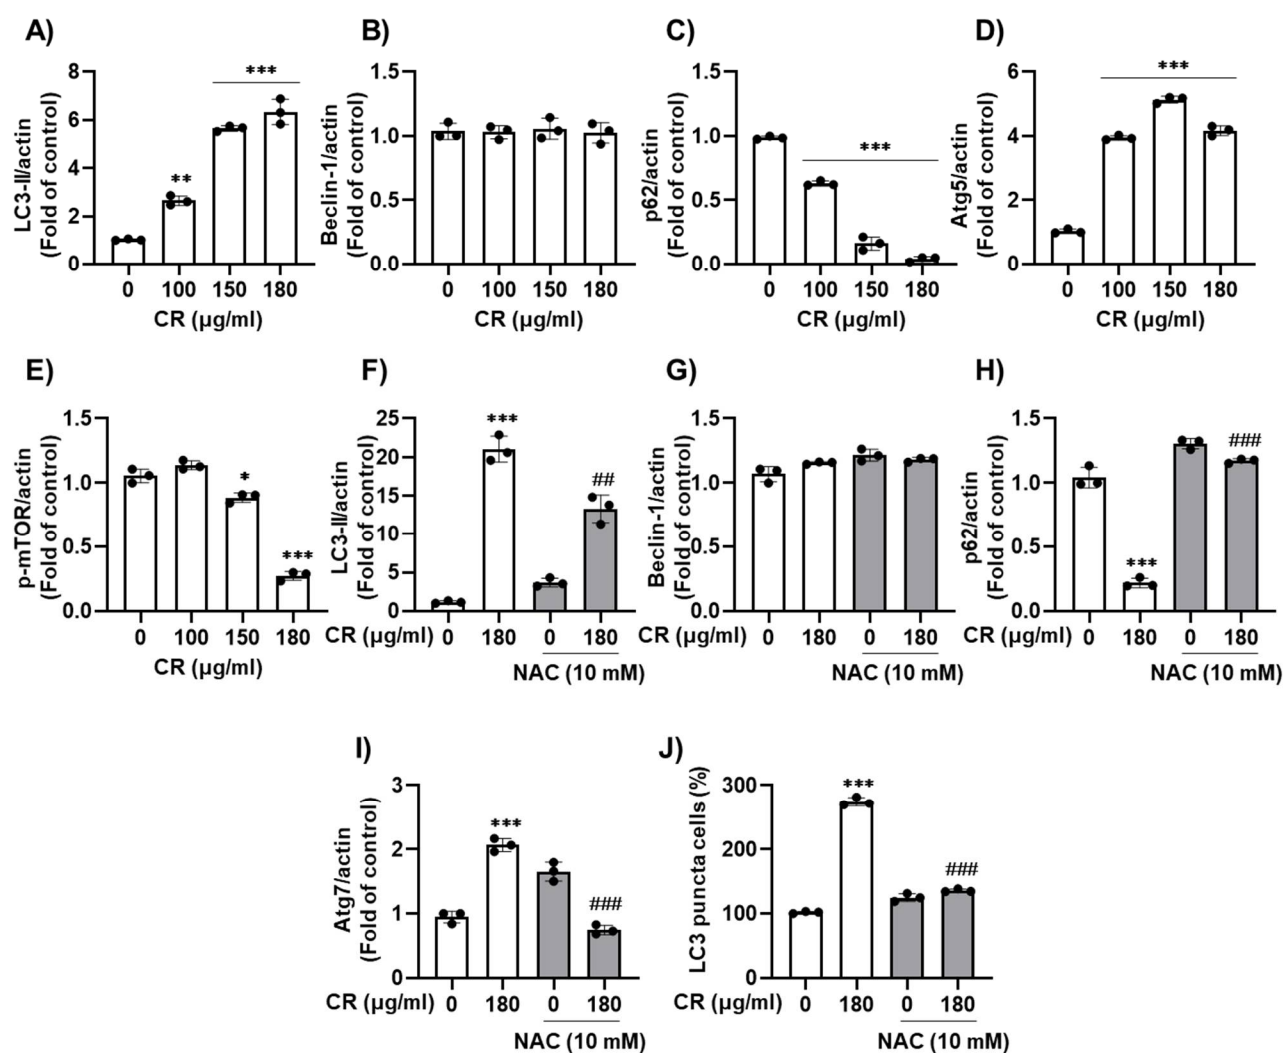

**Supplementary Figure S2.** Effect of Coptidis Rhizoma ethanol extract (CR) on autophagy.

(A–E) Hep3B cells were treated with indicated concentration of CR for 24 h. (F–I) Hep3B cells were pre-treated with or without N-acetylcysteine (NAC), ROS inhibitor, for 1 h, and then treated with 180 µg/mL of CR for 24 h. Bar graphs indicate the relative band density in western blot analysis ( $n = 3$ ). (J) Hep3B cells were pre-treated with or without N-acetylcysteine (NAC), ROS inhibitor, for 1 h, and then treated with 180 µg/mL of CR for 24 h. Bar graphs indicate the relative LC3 puncta in immunofluorescence ( $n = 3$ ). \*  $p < 0.05$  and \*\*\*  $p < 0.001$  compared to untreated cells; #  $p < 0.05$ , ##  $p < 0.01$  and ###  $p < 0.001$  compared to CR-treated cells.

**Supplementary Table S1.** The effect of oral administration of CR on organ weights in Hep3B xenograft model.

| Group     | Organ weights (g) |               |               |               |               |
|-----------|-------------------|---------------|---------------|---------------|---------------|
|           | Heart             | Lung          | Liver         | Kidney        | Spleen        |
| Normal    | 0.110 ± 0.08      | 0.138 ± 0.019 | 0.894 ± 0.111 | 0.258 ± 0.034 | 0.091 ± 0.017 |
| Control   | 0.110 ± 0.015     | 0.139 ± 0.017 | 0.955 ± 0.115 | 0.256 ± 0.027 | 0.139 ± 0.042 |
| CR 100    | 0.105 ± 0.008     | 0.132 ± 0.011 | 0.933 ± 0.064 | 0.266 ± 0.015 | 0.113 ± 0.026 |
| CR 200    | 0.106 ± 0.011     | 0.140 ± 0.017 | 0.979 ± 0.127 | 0.280 ± 0.027 | 0.125 ± 0.043 |
| Sorafenib | 0.111 ± 0.008     | 0.132 ± 0.007 | 0.964 ± 0.152 | 0.296 ± 0.023 | 0.101 ± 0.027 |

After 14 days of orally administered with treatments, each organ (heart, lung, liver, kidney and spleen) was isolated from CR ( $n = 10$ ) or sorafenib ( $n = 6$ ), and non-treated ( $n = 10$ ) xenograft mice as well as normal ( $n = 5$ ) mice and measured the weight. Data are presented as means ± SD. All data showed no statistically significant difference between all groups.

**Supplementary Table S2.** Changes in the hematological and biochemical profiles in Hep3B xenograft model.

| Parameter (units)                   | Group              |                     |                    |                    |                     |
|-------------------------------------|--------------------|---------------------|--------------------|--------------------|---------------------|
|                                     | Normal             | Control             | CR 100             | CR 200             | Sorafenib           |
| RBC ( $\times 10^3$ cells/ $\mu$ L) | 8.13 $\pm$ 0.35    | 8.28 $\pm$ 0.33     | 8.18 $\pm$ 0.43    | 8.60 $\pm$ 0.48    | 8.23 $\pm$ 0.33     |
| WBC ( $\times 10^3$ cells/ $\mu$ L) | 1.58 $\pm$ 0.73    | 1.70 $\pm$ 0.77     | 1.3 $\pm$ 0.78     | 1.64 $\pm$ 0.73    | 0.72 $\pm$ 0.67     |
| Hemoglobin (g/dL)                   | 11.58 $\pm$ 6.12   | 13.92 $\pm$ 0.86    | 13.72 $\pm$ 1.04   | 14.55 $\pm$ 0.79   | 14.48 $\pm$ 0.53    |
| Hematocrit (%)                      | 43.28 $\pm$ 1.85   | 43.63 $\pm$ 1.98    | 42.08 $\pm$ 2.37   | 44.82 $\pm$ 1.60   | 43.98 $\pm$ 1.90    |
| MCV (fL)                            | 53.20 $\pm$ 0.70   | 52.68 $\pm$ 1.75    | 51.47 $\pm$ 0.98   | 52.18 $\pm$ 1.99   | 53.48 $\pm$ 0.47    |
| MCH (pg)                            | 14.18 $\pm$ 7.40   | 16.80 $\pm$ 0.70    | 16.77 $\pm$ 0.69   | 16.95 $\pm$ 0.66   | 17.58 $\pm$ 0.38    |
| MCHC (g/dL)                         | 26.63 $\pm$ 13.91  | 31.88 $\pm$ 0.61    | 32.55 $\pm$ 0.90   | 32.50 $\pm$ 0.73   | 32.93 $\pm$ 0.92    |
| RDW (%)                             | 13.70 $\pm$ 0.59   | 13.33 $\pm$ 1.11    | 12.72 $\pm$ 0.31   | 12.88 $\pm$ 0.55   | 13.37 $\pm$ 0.30    |
| MPV (fL)                            | 10.75 $\pm$ 1.03   | 10.27 $\pm$ 0.40    | 9.95 $\pm$ 0.65    | 9.82 $\pm$ 0.34    | 9.98 $\pm$ 0.26     |
| PLT ( $\times 10^3$ cells/ $\mu$ L) | 804 $\pm$ 84       | 885 $\pm$ 73        | 924 $\pm$ 93       | 880 $\pm$ 234      | 827 $\pm$ 97        |
| ALT (U/L)                           | 101.00 $\pm$ 4.73  | 119.22 $\pm$ 23.20  | 109.28 $\pm$ 14.07 | 102.80 $\pm$ 13.84 | 126.78 $\pm$ 15.38  |
| AST (U/L)                           | 15.48 $\pm$ 1.10   | 18.97 $\pm$ 5.70    | 20.30 $\pm$ 4.41   | 20.07 $\pm$ 5.73   | 25.37 $\pm$ 3.00    |
| ALP (U/L)                           | 438.08 $\pm$ 88.15 | 311.37 $\pm$ 120.10 | 303.30 $\pm$ 66.62 | 335.93 $\pm$ 47.70 | 421.02 $\pm$ 152.86 |
| BUN (mg/dL)                         | 19.47 $\pm$ 2.01   | 18.21 $\pm$ 3.79    | 20.66 $\pm$ 3.12   | 22.96 $\pm$ 3.37   | 22.22 $\pm$ 2.67    |
| Creatinine (mg/dL)                  | 0.34 $\pm$ 0.02    | 0.32 $\pm$ 0.02     | 0.33 $\pm$ 0.03    | 0.32 $\pm$ 0.03    | 0.34 $\pm$ 0.03     |

After 14 days of orally administered with treatments, whole blood and serum of mice were collected from CR ( $n = 10$ ), sorafenib ( $n = 6$ ), non-treated ( $n = 10$ ), and normal ( $n = 5$ ) mice for hematological and biochemical assessment. Data are presented as means  $\pm$  SD. All data showed no statistically significant difference between groups. RBC, red blood cells; WBC, white blood cells; MCV, mean corpuscular volume; MCH, mean corpuscular hemoglobin; NCHC, MCH concentration; RDW, red blood cell distribution width; MPV, mean platelet volume; PLT, platelet; ALT, alanine aminotransferase; AST, aspartate aminotransferase; ALP, alkaline phosphatase; BUN, blood urea nitrogen.
